# Supplementary material for: A global fuel characteristic model and dataset for wildfire prediction
Source: Copernicus journal article supplement (doi:10.5194/bg-21-279-2024), 2024-01-17
Supplement: Supplementary file 1 [file bg-21-279-2024-supplement.pdf]

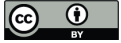

*Supplement of*

## **A global fuel characteristic model and dataset for wildfire prediction**

**Joe R. McNorton and Francesca Di Giuseppe**

*Correspondence to:* Joe R. McNorton ([joe.mcnorton@ecmwf.int](mailto:joe.mcnorton@ecmwf.int))

The copyright of individual parts of the supplement might differ from the article licence.

**Table S1. ECLand vegetation types and parameter values used to derive categorised fuel load. Values estimated where references are not given. †Relates LAI to wood mass (see equation 4, Harper et al., 2018).**

| Vegetation Type            | Live Percentage (%) | Dead Foliage Percentage (%) | Leaf Mass per Unit Area | Allometric Coefficient † | Reference                                                                              |
|----------------------------|---------------------|-----------------------------|-------------------------|--------------------------|----------------------------------------------------------------------------------------|
| Crops                      | 85                  | 100                         | 0.1370                  | 0.005                    | -                                                                                      |
| Short grass                | 85                  | 100                         | 0.0495                  | 0.005                    | Fan <i>et al.</i> (2007), Peichl <i>et al.</i> (2011), Perez <i>et al.</i> (2000)      |
| Evergreen needleleaf trees | 65                  | 45                          | 0.2263                  | 0.65                     | Pan <i>et al.</i> (2011)                                                               |
| Deciduous needleleaf trees | 55                  | 60                          | 0.1006                  | 0.80                     | Pan <i>et al.</i> (2011)                                                               |
| Deciduous broadleaf trees  | 60                  | 90                          | 0.0823                  | 0.78                     | Michaelian <i>et al.</i> (2010), Pan <i>et al.</i> (2011), Peichl <i>et al.</i> (2011) |
| Evergreen broadleaf trees  | 85                  | 10                          | 0.1039                  | 0.845                    | Pan <i>et al.</i> (2011)                                                               |
| Mixed Crops                | 60                  | 100                         | 0.1370                  | 0.005                    | Fan <i>et al.</i> (2007), Guo <i>et al.</i> (2005), Li <i>et al.</i> (2020)            |
| Desert                     | 50                  | 50                          | 0.1370                  | 0.005                    | -                                                                                      |

|                       |    |     |        |       |                                                              |
|-----------------------|----|-----|--------|-------|--------------------------------------------------------------|
| Tundra                | 75 | 50  | 0.0495 | 0.005 | -                                                            |
| Irrigated crops       | 85 | 100 | 0.1370 | 0.005 | -                                                            |
| Semidesert            | 65 | 50  | 0.1370 | 0.005 | -                                                            |
| Bogs and marshes      | 65 | 50  | 0.1370 | 0.005 | -                                                            |
| Evergreen shrubs      | 70 | 50  | 0.1515 | 0.13  | Anderson <i>et al.</i> (2015),<br>Baeza <i>et al.</i> (2006) |
| Deciduous shrubs      | 65 | 90  | 0.0709 | 0.13  | Li <i>et al.</i> (2020), Taylor <i>et al.</i> (2021)         |
| Broadleaf<br>Savannah | 80 | 90  | 0.1370 | 0.13  | -                                                            |
| Interrupted forest    | 60 | 90  | 0.1039 | 0.78  | -                                                            |

**Table S2. Validation of modelled fuel load using literature estimates.**

| Region | Year | Total<br>Modelled<br>Fuel (Pg) | Live<br>Modelled<br>Fuel (Pg) | Literature<br>Estimate<br>(Pg) | Reference                |
|--------|------|--------------------------------|-------------------------------|--------------------------------|--------------------------|
| Africa | 2010 | 99.7±8.2                       | 81.8±3.2                      | 77.1                           | Soto-Navarro et al. 2020 |

|                |           |           |           |       |                                |
|----------------|-----------|-----------|-----------|-------|--------------------------------|
| Africa         | 2017      | 115.9±7.6 | 89.0±3.1  | 117.5 | Rodriguez Veiga & Balzter 2021 |
| Canada         | 2010-2011 | 38.0±1.6  | 24.5±0.4  | 27.5  | Mauro <i>et al.</i> 2021       |
| Oregon,<br>USA | 2010-2016 | 2.68±0.17 | 1.88±0.05 | 2.14  | Matasci <i>et al.</i> 2018     |

5

**Table S3. Vegetation-specific coefficients used to derive live fuel moisture content used in equation 4.**

| Vegetation Type            | $LFMC_{max}$ | $A$    | $\alpha$ | $\beta$ | $\gamma$ |
|----------------------------|--------------|--------|----------|---------|----------|
| Crops                      | 110.8        | 1500.9 | 27.2     | 0.00    | 0.0      |
| Short Grass                | 197.4        | 119.7  | 0.2      | 0.23    | 0.5      |
| Evergreen needleleaf trees | 132.6        | 65.3   | 1.9      | 0.00    | 1.2      |
| Deciduous broadleaf trees  | 131.5        | 78.7   | 0.0      | 0.00    | 3.8      |
| Mixed Crops                | 165.8        | 148.2  | 4.3      | 0.00    | 0.6      |
| Deciduous shrubs           | 158.8        | 131.0  | 3.5      | 0.00    | 1.7      |
| Broadleaf Savannah         | 242.3        | 237.9  | 1.8      | 0.03    | 0.0      |

**Table S4. Allocation of vegetation-specific fuel into the 4 classes defined by the National Fire Danger Rating System (Deeming *et al.*, 1978).**

| Vegetation Type            | 1-h Fuel (% of dead foliage) | 10-h Fuel (% of dead foliage) | 100-h Fuel (% of dead wood) | 1000-h Fuel (% of dead wood) |
|----------------------------|------------------------------|-------------------------------|-----------------------------|------------------------------|
| Crops                      | 50                           | 50                            | 100                         | 0                            |
| Short grass                | 100                          | 0                             | 100                         | 0                            |
| Evergreen needleleaf trees | 53                           | 47                            | 30                          | 70                           |
| Deciduous needleleaf trees | 53                           | 47                            | 30                          | 70                           |
| Deciduous broadleaf trees  | 53                           | 47                            | 30                          | 70                           |
| Evergreen broadleaf trees  | 53                           | 47                            | 30                          | 70                           |
| Mixed Crops                | 50                           | 50                            | 100                         | 0                            |
| Desert                     | 65                           | 35                            | 100                         | 0                            |
| Tundra                     | 65                           | 35                            | 100                         | 0                            |
| Irrigated crops            | 50                           | 50                            | 100                         | 0                            |
| Semidesert                 | 65                           | 35                            | 100                         | 0                            |
| Bogs and marshes           | 65                           | 35                            | 100                         | 0                            |

|                    |    |    |     |    |
|--------------------|----|----|-----|----|
| Evergreen shrubs   | 65 | 35 | 100 | 0  |
| Deciduous shrubs   | 50 | 50 | 100 | 0  |
| Broadleaf Savannah | 50 | 50 | 50  | 50 |
| Interrupted forest | 50 | 50 | 50  | 50 |

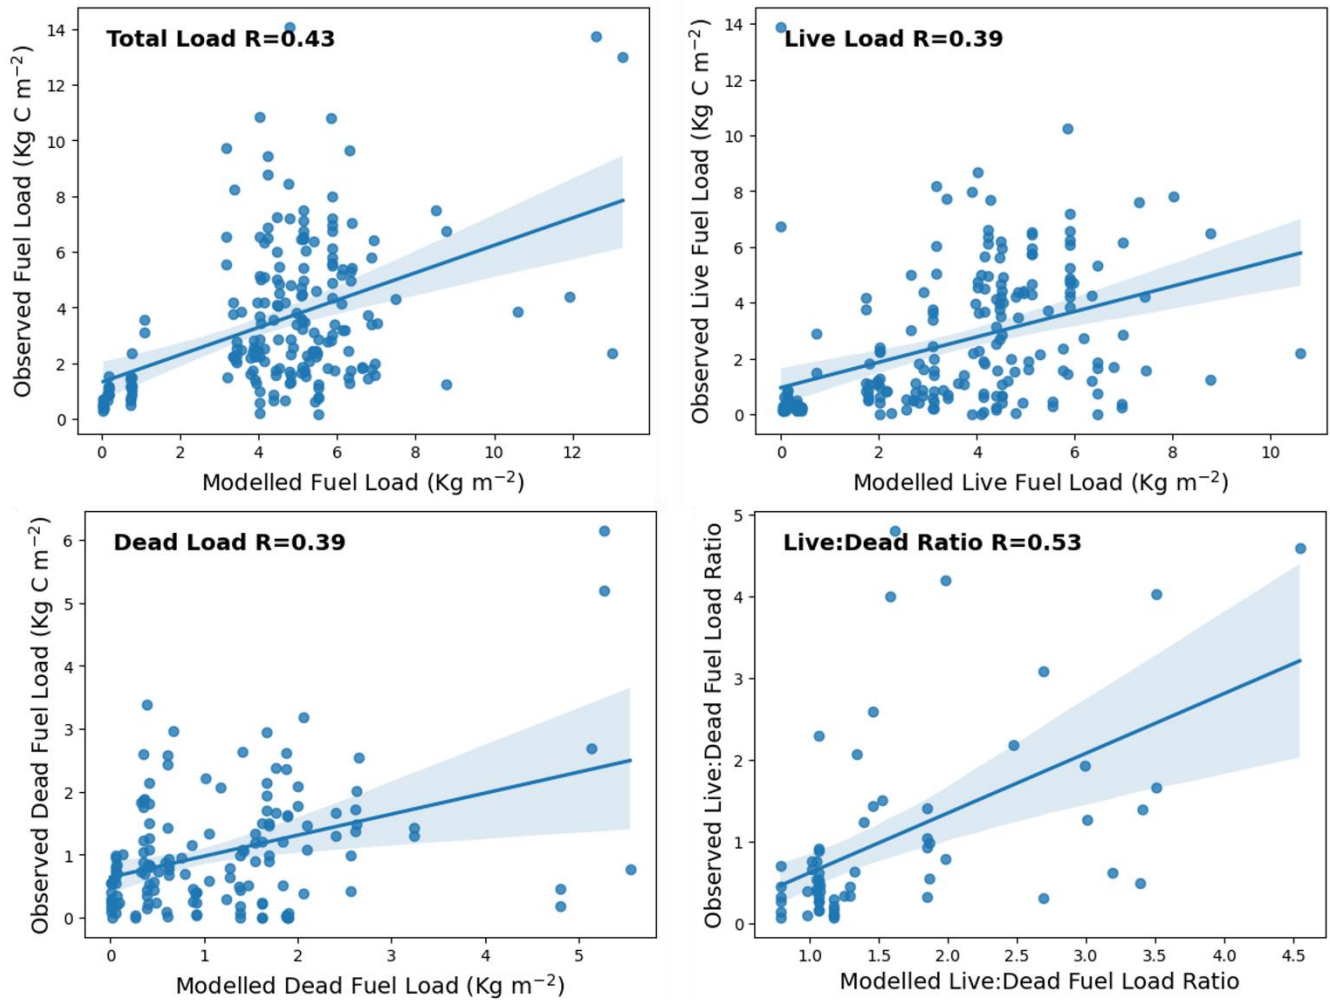

10

Figure S1. A comparison of modelled fuel load with site measurements for total (top left), live (top right) and dead (bottom left) fuel. Also shown is the comparison between the modelled and observed live-to-dead fuel ratio (bottom right). The correlation value,  $R$ , is displayed on each panel.

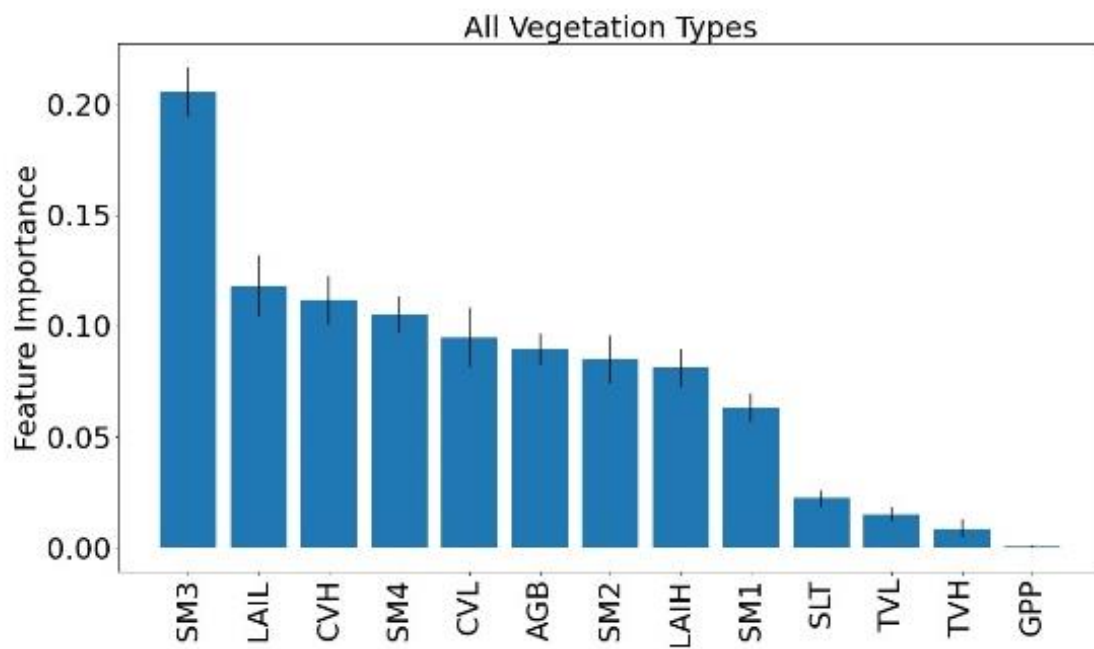

15 Figure S2. Feature importance output from random forest training of model variables against live fuel moisture content observations.

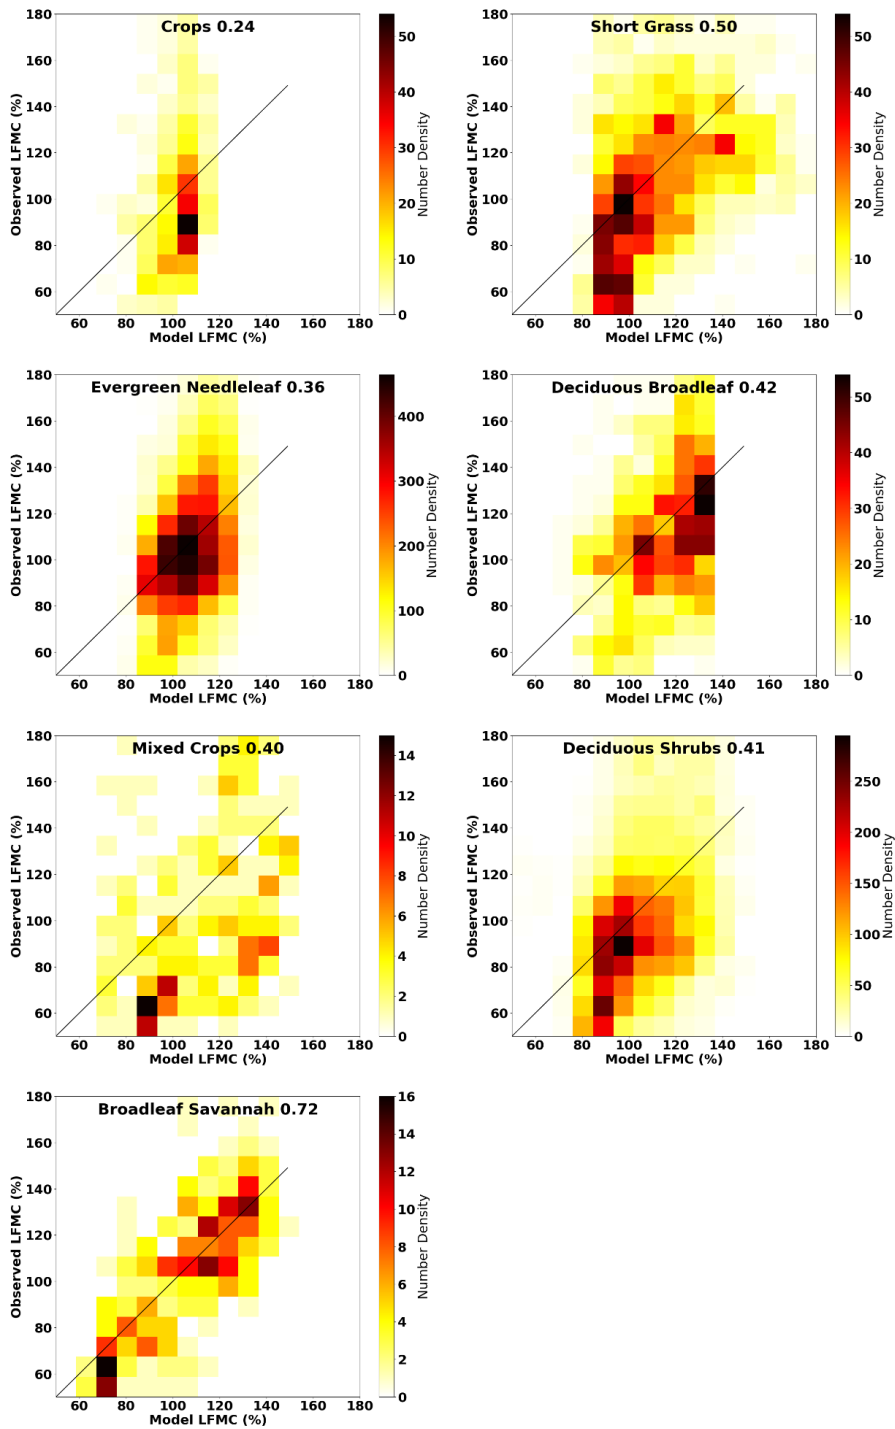

Figure S3. A density heat map showing the correlation of all modelled and sampled live fuel moisture content for 7 vegetation types between 2010 and 2019. The R-value is given for each type.
